# Supplementary material
Source: PubMed Central journal article supplement (PMC3991733)

Figure S1

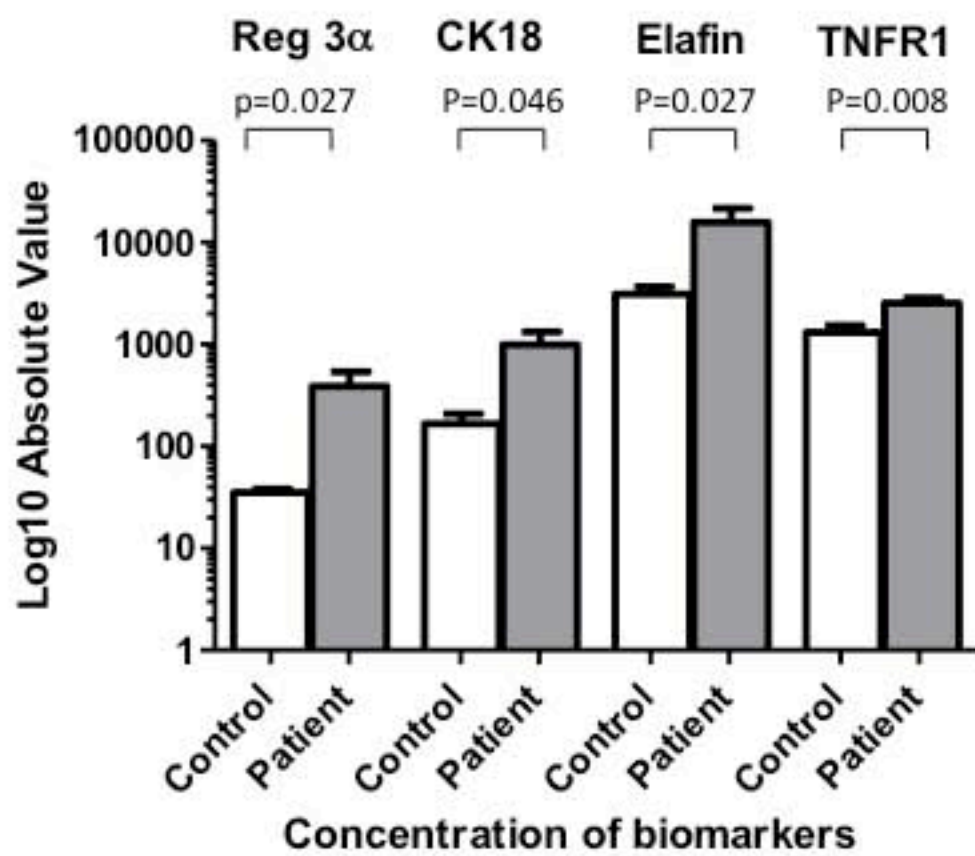

Figure S2

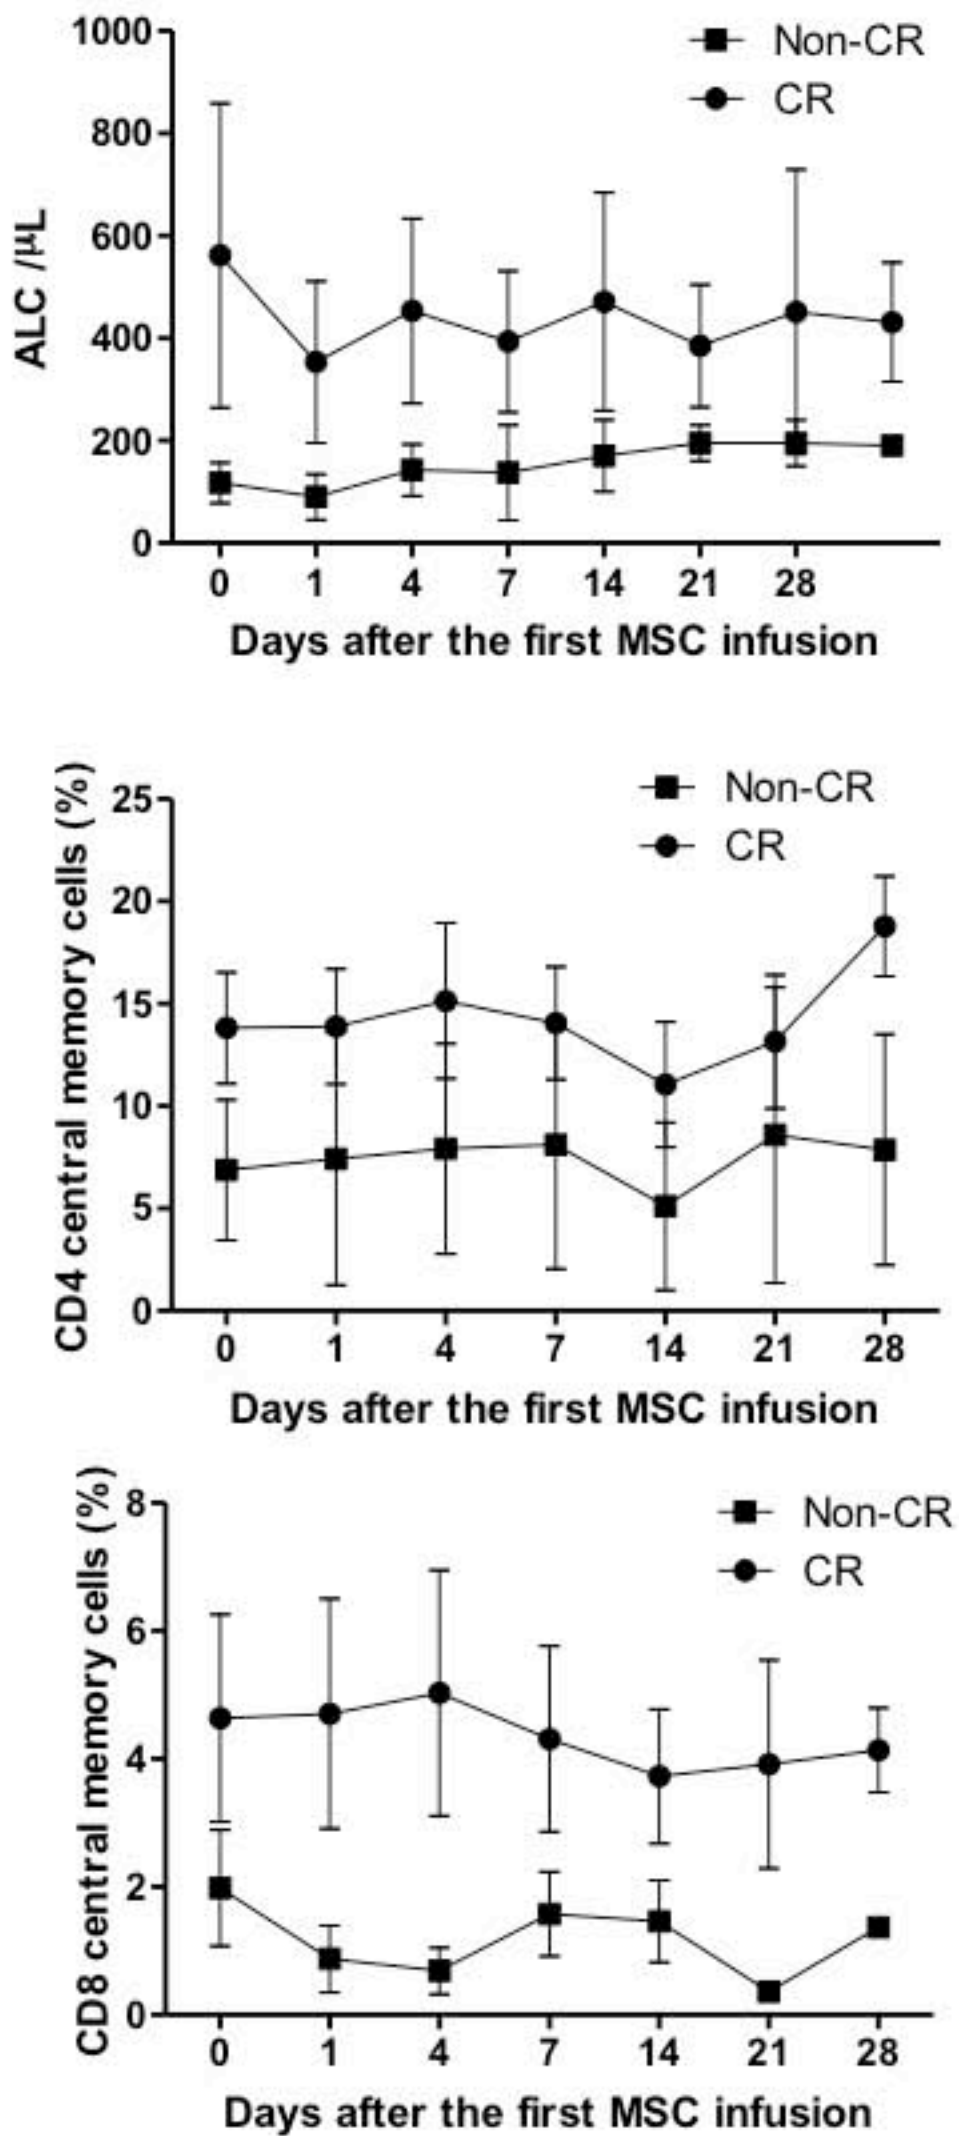

Supplement: NIHMS562104-supplement-Supp_Fig_S1-S2.pdf [file NIHMS562104-supplement-Supp_Fig_S1-S2.pdf]
